# Supplementary figures and images for: Sequencing and analysis of an Irish human genome
Source: Springer Nature journal article supplement (doi:10.1186/gb-2010-11-9-r91), 2010-09-07

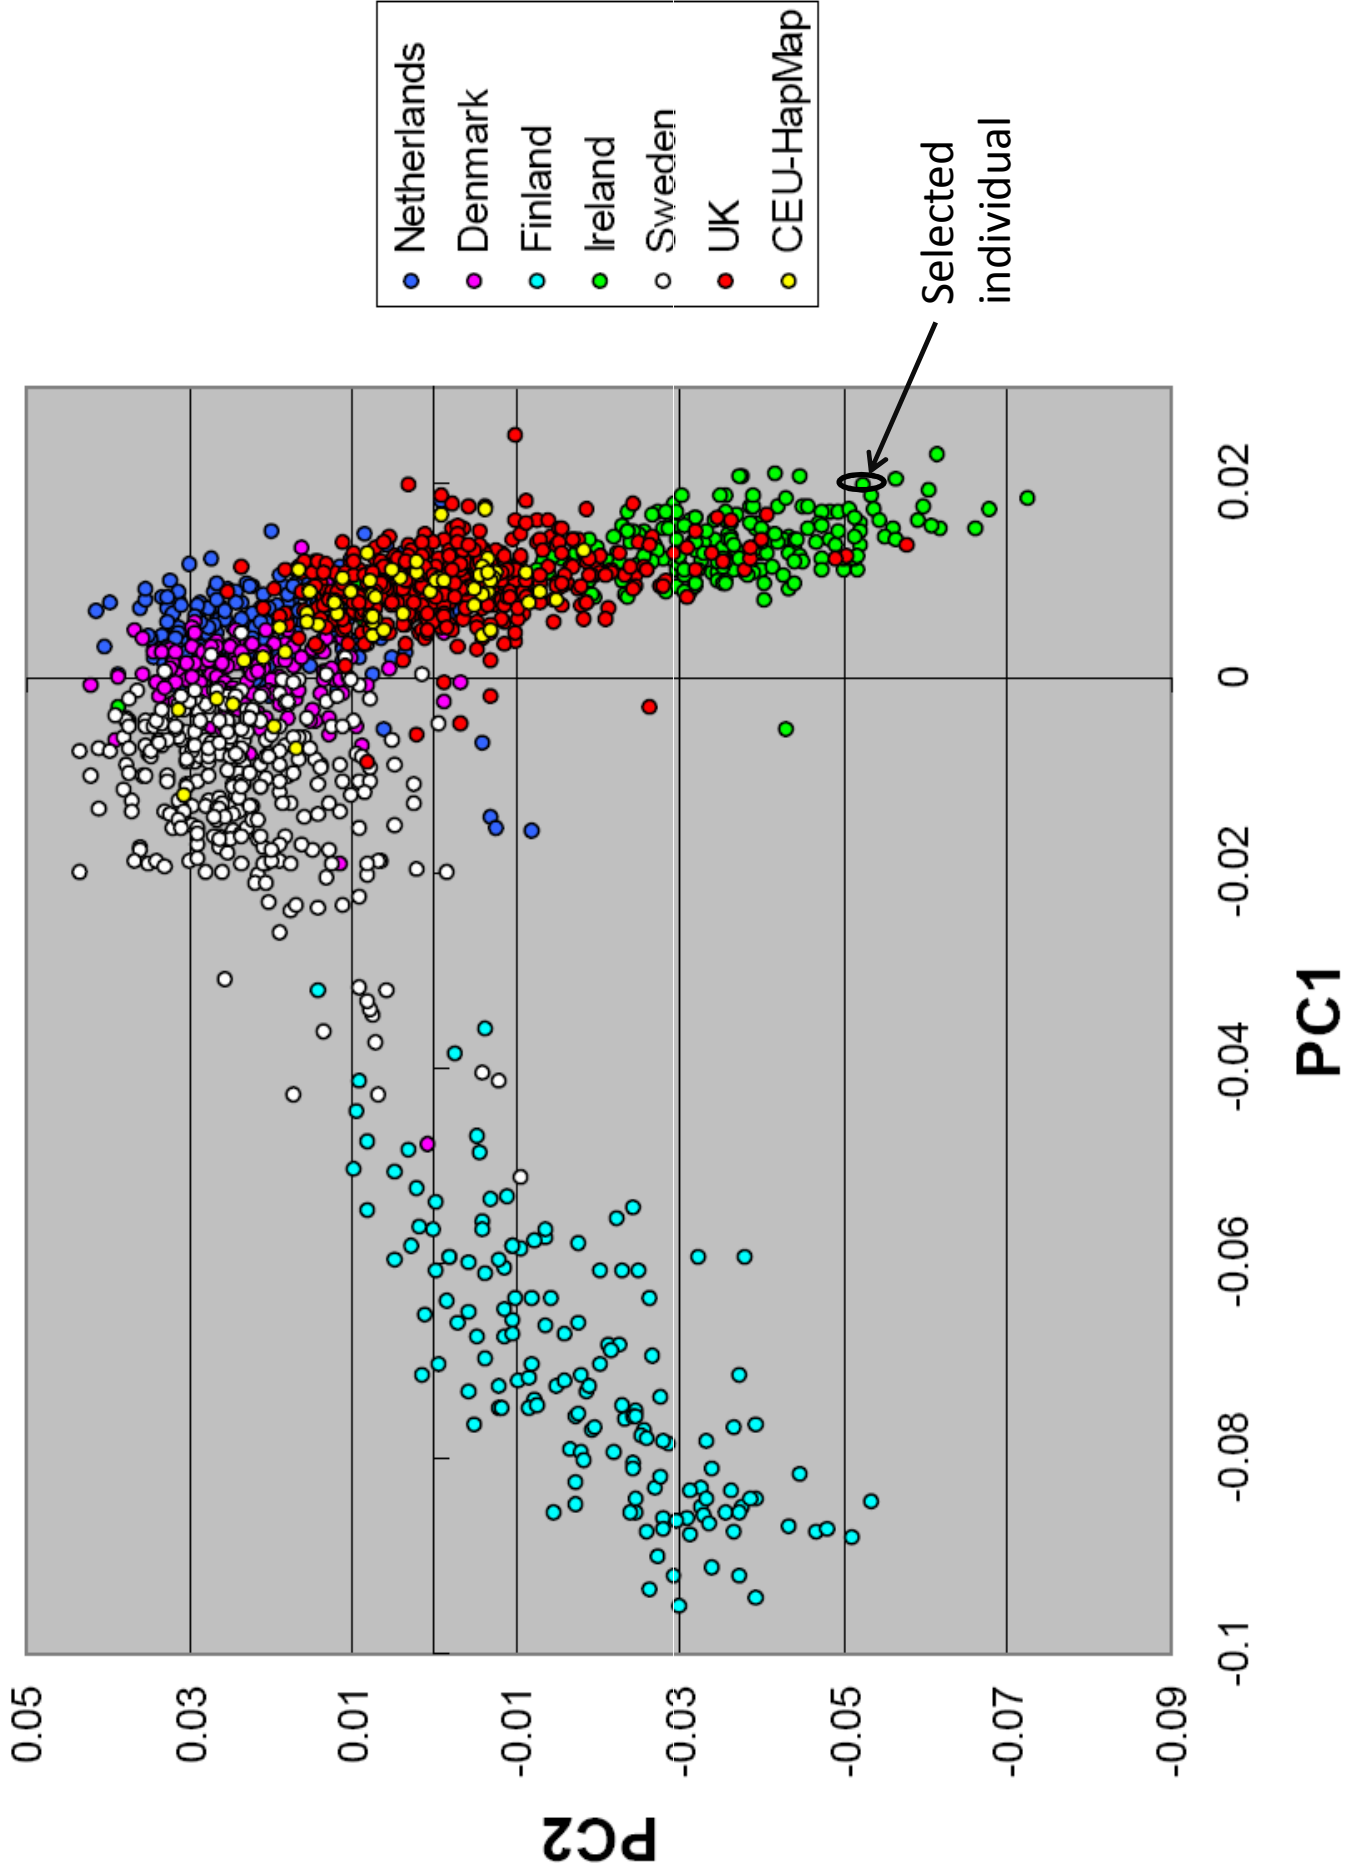

Figure adapted from [13] with the kind permission of Dr B McEvoy

Supplement: Additional file 1 [file gb-2010-11-9-r91-s1.pdf]

Tajima's D

-2 -1 0 1 2

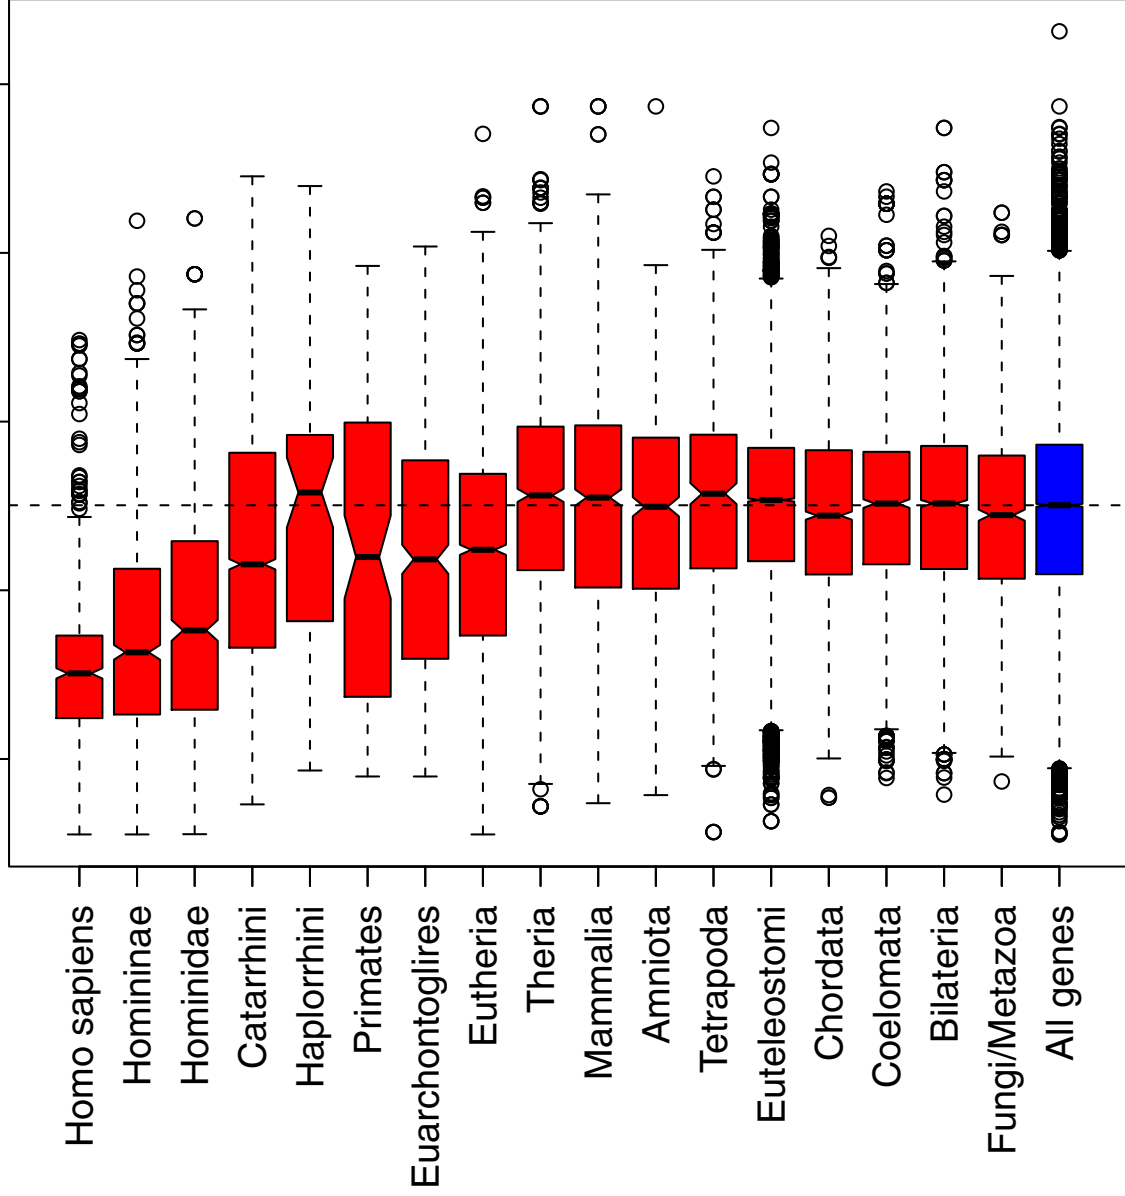

Supplement: 13059_2010_2384_MOESM10_ESM.pdf [file 13059_2010_2384_MOESM10_ESM.pdf]

## SNPs

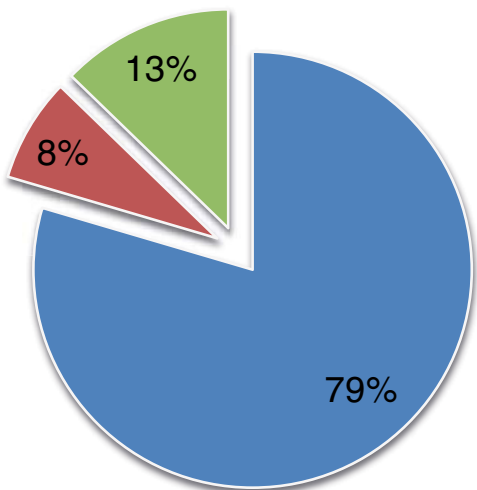

## Indels

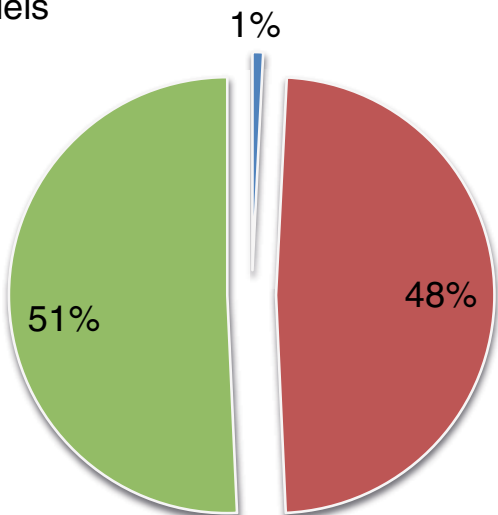

■ Validated ■ Non-validated ■ Novel

Supplement: 13059_2010_2384_MOESM6_ESM.pdf [file 13059_2010_2384_MOESM6_ESM.pdf]

# MST1

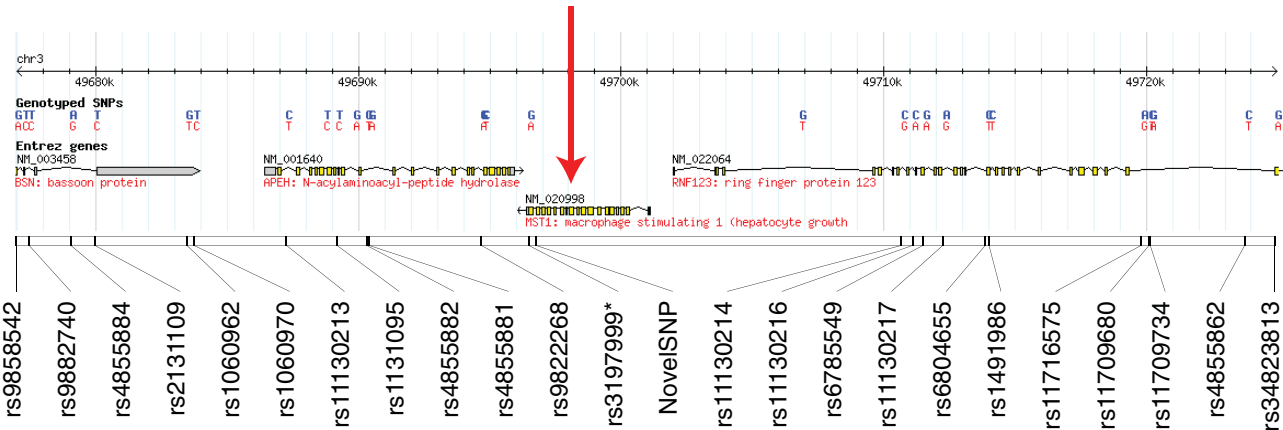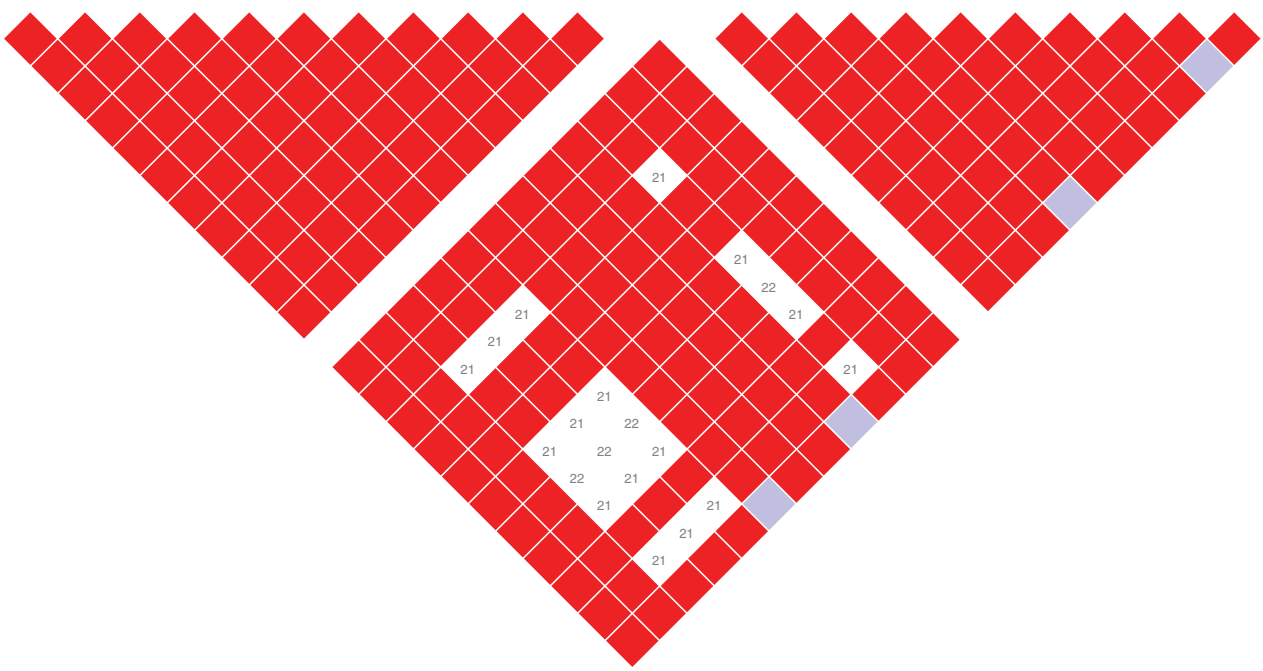

Supplement: 13059_2010_2384_MOESM7_ESM.pdf [file 13059_2010_2384_MOESM7_ESM.pdf]

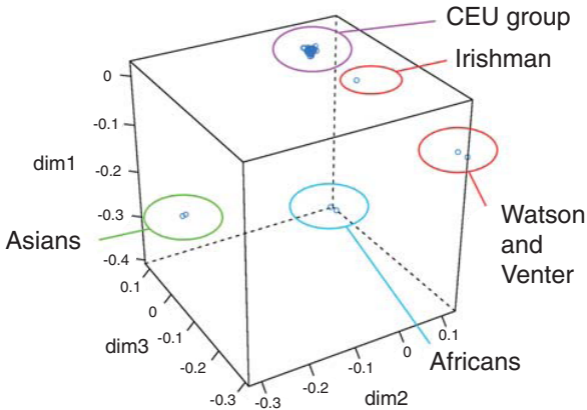

Supplement: 13059_2010_2384_MOESM8_ESM.pdf [file 13059_2010_2384_MOESM8_ESM.pdf]

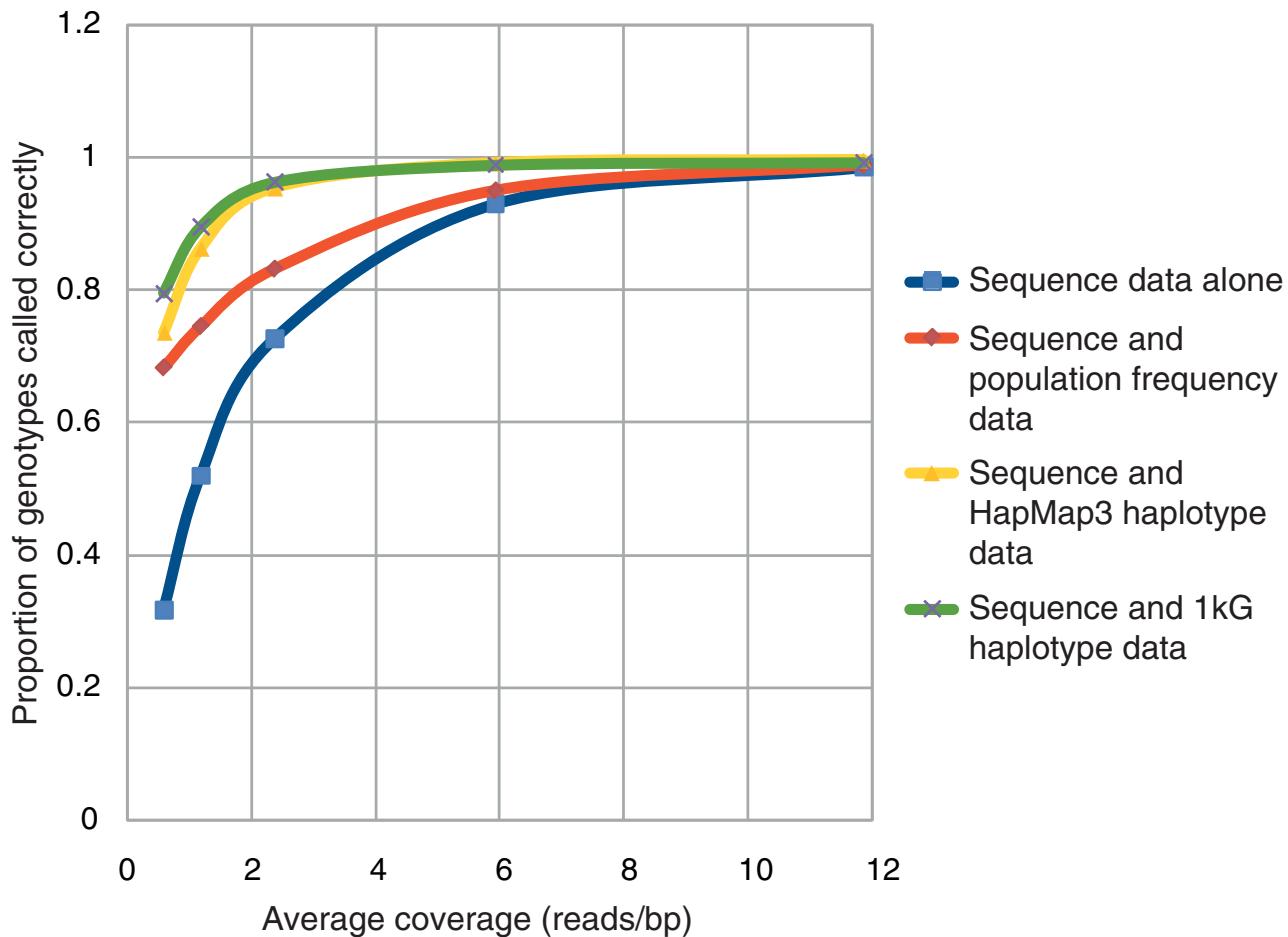

Supplement: 13059_2010_2384_MOESM9_ESM.pdf [file 13059_2010_2384_MOESM9_ESM.pdf]
